# Supplementary material for: Cognitively normal women with Alzheimer’s disease proteinopathy show relative preservation of memory but not of hippocampal volume
Source: PubMed Central journal article supplement (PMC6933621; doi:10.1186/s13195-019-0565-1), 2019-12-26

# A. Subjective cognitive decline    B. Mild cognitive impairment

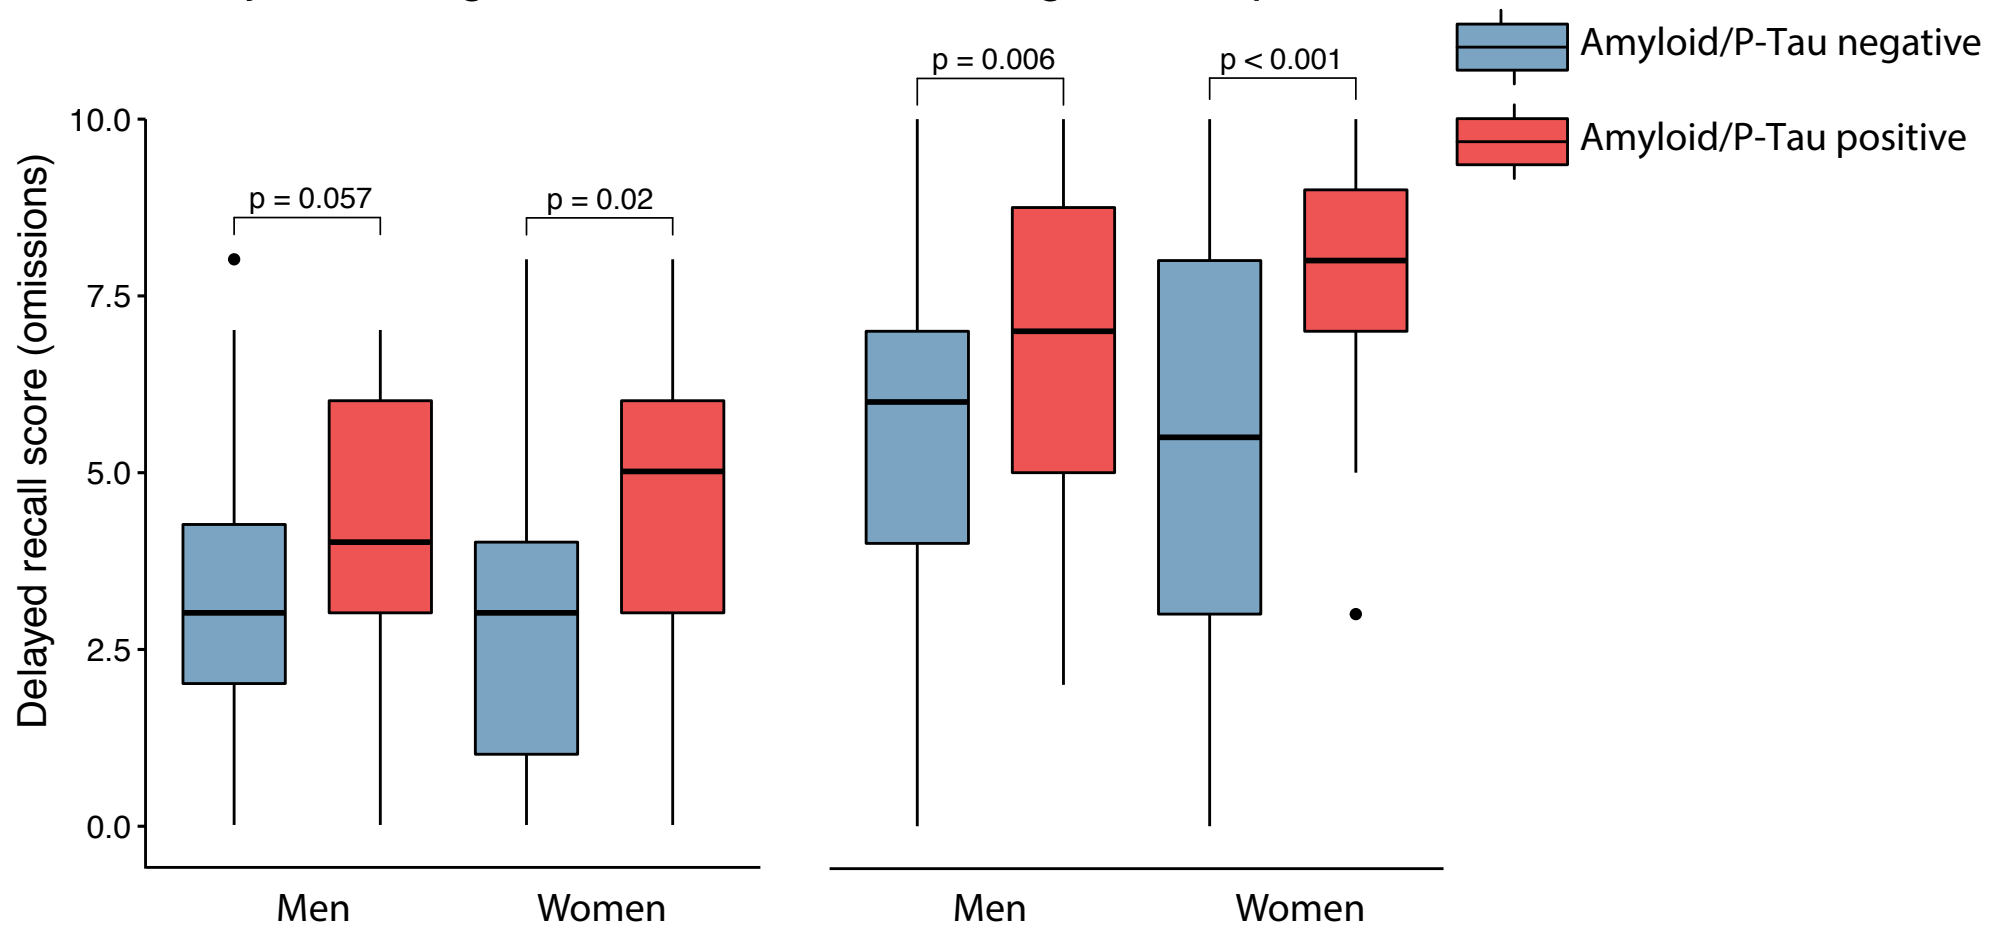

Supplement: 13195_2019_565_MOESM1_ESM.pdf [file 13195_2019_565_MOESM1_ESM.pdf]
